# Supplementary material
Source: publisher site journal article supplement (https://www.spandidos-publications.com/2653/downloadSupplementary)

Figure S1. Association of miR-146b with the clinical course. Comparisons of miR-146b expression among groups were determined using the Kruskal-Wallis H-test. \*\*\* $P < 0.001$  (significant differences were found between all groups). miR, microRNA.

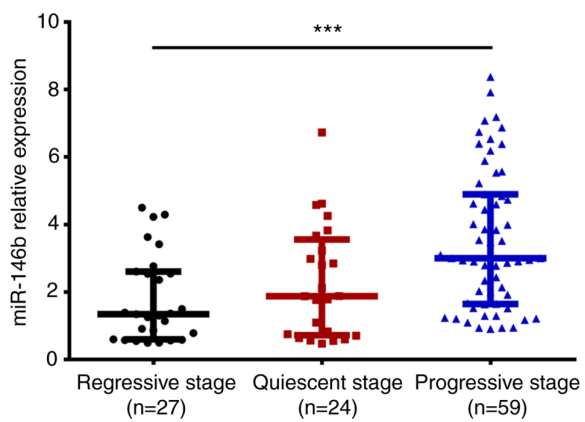

Supplement: Supplementary file 1 [file downloadSupplementary]
